# Supplementary material
Source: ML conference proceedings conference paper supplement (https://openaccess.thecvf.com/content/CVPR2022/html/Wandt_ElePose_Unsupervised_3D_CVPR_2022_paper.html)
Supplement: Supplementary file 1 [file Wandt_ElePose_Unsupervised_3D_CVPR_2022_supplemental.pdf]

# Supplemental Material: ElePose: Unsupervised 3D Human Pose Estimation by Predicting Camera Elevation and Learning Normalizing Flows on 2D Poses

Bastian Wandt, James J. Little, and Helge Rhodin

University of British Columbia

{wandt, little, rhodin}@cs.ubc.ca

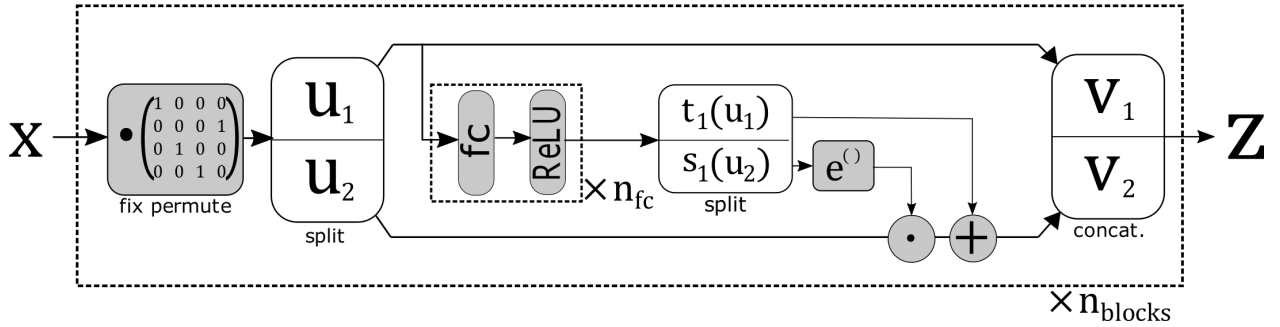

Figure 1. The normalizing flow consists of multiple consecutive coupling blocks. Each block performs a random permutation of the input vector and splits it into two parts. The upper part is used to predict an element-wise scale and a translation which deform the lower part. After deformation the upper part is concatenated with the transformed lower part.

## 1. Normalizing Flow Architecture

Informally, a normalizing flow is a tool to efficiently map distributions back and forth between two spaces. It applies to density estimation and also serves well as a generative model.

Let  $\mathcal{Z} \in \mathbb{R}^N$  be a known distribution (in our case a normal distribution) and  $g$  be an invertible function  $g(\mathbf{z}) = \mathbf{x}$ , with  $\mathbf{x} \in \mathbb{R}^N$  as a vector representing the joints of a human pose<sup>1</sup>. With the change of variables formula the probability density function of  $\mathbf{x}$  is computed as

$$p_{\mathcal{X}}(\mathbf{x}) = p_{\mathcal{Z}}(f(\mathbf{x})) \left| \det \left( \frac{\partial f}{\partial \mathbf{x}} \right) \right|, \quad (1)$$

where  $f$  is the inverse of  $g$  and  $\frac{\partial f}{\partial \mathbf{x}}$  is the Jacobian of  $f$ . That means given an invertible function  $f$  the density of a 2D pose  $\mathbf{x}$  can be calculated by the product of the density of its projection  $f(\mathbf{x})$  with the respective Jacobian determinant. In our case  $f$  is the trainable neural network proposed in [1]. It consists of multiple consecutive *affine coupling blocks*. As shown in Fig. 1 each coupling block splits the input vector into two parts,  $u_1$  and  $u_2$ . In the forward pass,

a scale  $s$  and a translation  $t$  is computed from  $u_1$  and applied to  $u_2$  such that

$$v_2 = \exp(s(u_1))u_2 + t(u_1) \quad \text{and} \quad v_1 = u_1. \quad (2)$$

The backward path is defined by

$$u_1 = v_1 \quad \text{and} \quad u_2 = (v_2 - t(v_1)) \exp(-s(v_1)). \quad (3)$$

The benefit of this formulation is the tractable computation of the determinant  $\det(\frac{\partial f}{\partial \mathbf{x}})$ . The Jacobian is given by

$$\frac{\partial f}{\partial \mathbf{x}} = \begin{pmatrix} \mathbf{I}_N & \mathbf{0} \\ \frac{\partial v_2}{\partial u_1} & \text{diag}(\exp(s(u_1))) \end{pmatrix}, \quad (4)$$

where  $\text{diag}(\cdot)$  is a diagonal matrix. Since we are only interested in the determinant of the Jacobian, it simplifies to

$$\det \left( \frac{\partial f}{\partial \mathbf{x}} \right) = \exp \left( \sum_j s(u_1)_j \right). \quad (5)$$

Note that the Jacobian of  $f$  does not require computing the Jacobian of  $s$  and  $t$ . That means  $s$  and  $t$  can be arbitrarily complex. Since  $u_1$  remains unchanged in one coupling layer, the input vector to each coupling layer is randomly permuted.

<sup>1</sup>In our case, this is either the 2D pose vector  $\mathbf{x}$  or its image in the PCA subspace.

## References

- [1] Laurent Dinh, Jascha Sohl-Dickstein, and Samy Bengio. Density estimation using real NVP. In *5th International Conference on Learning Representations, ICLR 2017, Toulon, France, April 24-26, 2017, Conference Track Proceedings*. OpenReview.net, 2017. 1
